# Supplementary material for: Comparative Study of Exome Copy Number Variation Estimation Tools Using Array Comparative Genomic Hybridization as Control
Source: Biomed Res Int. 2013 Nov 4;2013:915636. doi: 10.1155/2013/915636 (PMC3835197; doi:10.1155/2013/915636)
Supplement: Supplementary file 1 — Table S1: CNV Tools Summary [file 915636.f1.xlsx]

## Sheet: TableS1
Table S1. CNV Tools Summary
software	publish	Journal	Citation	version	update	source	Input	restriction	paper	download
SegSeq	2009	Nature Methods	133	1.0.1	NA	Matlab	WG	None	http://www.nature.com/nmeth/journal/v6/n1/full/nmeth.1276.html	http://www.broadinstitute.org/cgi-bin/cancer/publications/pub_paper.cgi?mode=view&paper_id=182
JointSLM	2011	Nucleic Acids Research	5	0.1	NA	R	WG	None	http://nar.oxfordjournals.org/content/39/10/e65.full	http://nar.oxfordjournals.org/content/suppl/2011/02/16/gkr068.DC1
CNVer	2010	Genome Research	26	0.8.1	201106	C/C++	WG	bowtie and fixed parameter	http://genome.cshlp.org/content/20/11/1613	http://compbio.cs.toronto.edu/cnver/
CopySeq	2010	PLoS Computational Biology	13	1.7.1	201106	Java+R	WG	human only	http://www.ploscompbiol.org/article/info%3Adoi%2F10.1371%2Fjournal.pcbi.1000988	http://www.embl.de/~korbel/CopySeq/
ReadDepth	2011	PLoS ONE	9	0.9.8.4	201204	R	WG	None	http://www.plosone.org/article/info:doi/10.1371/journal.pone.0016327	https://code.google.com/p/readdepth/
Contra	2012	Bioinformatics	5	2.0.3	201207	Python+R	Exome	paired data	http://bioinformatics.oxfordjournals.org/content/28/10/1307	http://sourceforge.net/apps/mediawiki/contra-cnv/index.php?title=CONTRA:_Copy_Number_Analysis_for_Targeted_Resequencing
ExomeCNV	2011	Bioinformatics	35	1.4	201208	R	Exome	paired data, human only	http://bioinformatics.oxfordjournals.org/content/27/19/2648.long	http://cran.r-project.org/web/packages/ExomeCNV/index.html
CNANorm	2012	Bioinformatics	3	1.5.0	201208	R	Exome	paired data	http://bioinformatics.oxfordjournals.org/content/28/1/40.long	http://bioconductor.org/packages/2.12/bioc/html/CNAnorm.html
CoNIFER	2012	Genome Research	10	0.2.2	201209	Python	Exome	None	http://genome.cshlp.org/content/22/8/1525	http://conifer.sourceforge.net/tutorial.html
CNVnator	2011	Genome Research	34	0.2.7	201209	Perl/C++	WG	None	http://genome.cshlp.org/content/21/6/974.long	http://sv.gersteinlab.org/cnvnator/
MrCaNaVaR	2009	Nature Genetics	173	0.41	201211	C	WG	limited on mrFAST or mrsFAST mapper	http://www.nature.com/ng/journal/v41/n10/full/ng.437.html	http://mrcanavar.sourceforge.net/
ExomeDepth	2012	Bioinformatics	1	0.9.7	201212	R	Exome	None	http://bioinformatics.oxfordjournals.org/content/28/21/2747	http://cran.r-project.org/web/packages/ExomeDepth/index.html
exomeCopy	2011	Statistical Applications in Genetics and Molecular Biology	1	1.5.8	201301	R	Exome	None	http://cmb.molgen.mpg.de/publications/Love_2011_exomeCopy.pdf	http://www.bioconductor.org/packages/2.12/bioc/html/exomeCopy.html
CNV-seq	2009	BMC Bioinformatics	69	NA	201302	Perl+R	WG	paired data	http://www.biomedcentral.com/1471-2105/10/80	http://tiger.dbs.nus.edu.sg/cnv-seq/
Control-FREEC	2011	Bioinformatics	14	6.3	201303	C++	WG	None	http://bioinformatics.oxfordjournals.org/content/27/2/268	http://bioinfo-out.curie.fr/projects/freec/
cn.mops	2012	Nucleic Acids Research	5	1.5.16	201303	R	Exome	None	http://nar.oxfordjournals.org/content/40/9/e69	http://www.bioinf.jku.at/software/cnmops/

## Sheet: TableS2
Table S2. Exome Sequencing Alignment Quality Control
Sample	Cell Line	TotalReads	Duplicated	%Duplicated	Mapped Reads	%Mapped Reads	Proper Mapped Reads	%ProperMappedReads	Coding Reads	%CodingReads
2110-JP-1	BT549	99733494	36894357	0.3699	98137918	0.984	97542042	0.978	42819171	0.4363
2110-JP-2	CAL120	122427412	49898860	0.4076	120465903	0.984	119761040	0.9782	49405891	0.4101
2110-JP-3	CAL148	110731104	48599601	0.4389	108849128	0.983	108179636	0.977	42507190	0.3905
2110-JP-4	CAL51	96474208	39343123	0.4078	94942007	0.9841	94475824	0.9793	40047467	0.4218
2110-JP-5	CAL851	123594928	51695050	0.4183	121801254	0.9855	121098334	0.9798	49132455	0.4034
2110-JP-6	DU4475	70033312	21579885	0.3081	69201717	0.9881	68851520	0.9831	34059976	0.4922
2110-JP-7	HDQP1	167444128	92890856	0.5548	164882182	0.9847	164084440	0.9799	50974361	0.3092
2110-JP-8	HS578T	79648992	30760568	0.3862	78425561	0.9846	77987810	0.9791	33434263	0.4263
2110-JP-9	MDAMB157	82223168	35860850	0.4361	80513178	0.9792	80135076	0.9746	31548353	0.3918
2110-JP-10	MDAMB231	73477304	22652798	0.3083	72027127	0.9803	71618328	0.9747	35103687	0.4874
2110-JP-11	MDAMB436	187405814	30775516	0.1642	182326952	0.9729	180993972	0.9658	104559776	0.5735
2110-JP-12	MDABM453	151617458	25166867	0.166	147635349	0.9737	146568622	0.9667	85432895	0.5787
2110-JP-13	MFM223	125027880	15709828	0.1257	119246448	0.9538	118357910	0.9467	71464056	0.5993
2110-JP-14	SUM149	143365106	18002594	0.1256	136873283	0.9547	136182482	0.9499	85195675	0.6224
2110-JP-15	SUM159	121691740	18407153	0.1513	115560049	0.9496	114586726	0.9416	66408556	0.5747
2110-JP-16	SUM185	126335768	19118682	0.1513	120133182	0.9509	119292324	0.9442	70719465	0.5887

## Sheet: TableS3
Table S3. Command used for each CNV tool
[shengq1@cqs2 result]$ more cnmops_2110.r
library(cn.mops)
setwd("/scratch/cqs/shengq1/dnaseq/2110/cnmops/result")
SampleNames <- c(
2110_JP_01
,"2110_JP_02"
,"2110_JP_03"
,"2110_JP_04"
,"2110_JP_05"
,"2110_JP_06"
,"2110_JP_07"
,"2110_JP_08"
,"2110_JP_09"
,"2110_JP_10"
,"2110_JP_11"
,"2110_JP_12"
,"2110_JP_13"
,"2110_JP_14"
,"2110_JP_15"
,"2110_JP_16"
)
BAMFiles <- c(
/scratch/cqs/shengq1/dnaseq/2110/bwa_markdup/2110-JP-1_realigned_recal_rmdup.sorted.bam
,"/scratch/cqs/shengq1/dnaseq/2110/bwa_markdup/2110-JP-2_realigned_recal_rmdup.sorted.bam"
,"/scratch/cqs/shengq1/dnaseq/2110/bwa_markdup/2110-JP-3_realigned_recal_rmdup.sorted.bam"
,"/scratch/cqs/shengq1/dnaseq/2110/bwa_markdup/2110-JP-4_realigned_recal_rmdup.sorted.bam"
,"/scratch/cqs/shengq1/dnaseq/2110/bwa_markdup/2110-JP-5_realigned_recal_rmdup.sorted.bam"
,"/scratch/cqs/shengq1/dnaseq/2110/bwa_markdup/2110-JP-6_realigned_recal_rmdup.sorted.bam"
,"/scratch/cqs/shengq1/dnaseq/2110/bwa_markdup/2110-JP-7_realigned_recal_rmdup.sorted.bam"
,"/scratch/cqs/shengq1/dnaseq/2110/bwa_markdup/2110-JP-8_realigned_recal_rmdup.sorted.bam"
,"/scratch/cqs/shengq1/dnaseq/2110/bwa_markdup/2110-JP-9_realigned_recal_rmdup.sorted.bam"
,"/scratch/cqs/shengq1/dnaseq/2110/bwa_markdup/2110-JP-10_realigned_recal_rmdup.sorted.bam"
,"/scratch/cqs/shengq1/dnaseq/2110/bwa_markdup/2110-JP-11_realigned_recal_rmdup.sorted.bam"
,"/scratch/cqs/shengq1/dnaseq/2110/bwa_markdup/2110-JP-12_realigned_recal_rmdup.sorted.bam"
,"/scratch/cqs/shengq1/dnaseq/2110/bwa_markdup/2110-JP-13_realigned_recal_rmdup.sorted.bam"
,"/scratch/cqs/shengq1/dnaseq/2110/bwa_markdup/2110-JP-14_realigned_recal_rmdup.sorted.bam"
,"/scratch/cqs/shengq1/dnaseq/2110/bwa_markdup/2110-JP-15_realigned_recal_rmdup.sorted.bam"
,"/scratch/cqs/shengq1/dnaseq/2110/bwa_markdup/2110-JP-16_realigned_recal_rmdup.sorted.bam"
)
segments <- read.table("/scratch/cqs/lij17/cnv/SureSelect_XT_Human_All_Exon_V4_withoutchr_withoutY_lite.bed", sep="\t", as.is=TRUE, header=T)
gr <- GRanges(segments[,1], IRanges(segments[,2],segments[,3]), gene=segments[,4])
x <- getSegmentReadCountsFromBAM(BAMFiles, GR=gr, sampleNames=SampleNames, mode="paired")
save(x, file="2110_x_getSegmentReadCountsFromBAM.Rdata")
resCNMOPS <- exomecn.mops(x)
save(resCNMOPS, file="2110_resCNMOPS_exomecn.mops.Rdata")
cnvs<-resCNMOPS@cnvs
d<-cbind(substring(as.character(cnvs@elementMetadata@listData$sampleName),2),
as.character(cnvs@seqnames),
as.character(cnvs@ranges@start),
as.character(as.numeric(cnvs@ranges@start) + as.numeric(cnvs@ranges@width) - 1),
as.character(cnvs@ranges@width),
as.character(cnvs@elementMetadata@listData$CN),
as.character(cnvs@elementMetadata@listData$median),
as.character(cnvs@elementMetadata@listData$mean))
colnames(d)<-c("sample","chr","start","end", "length","type","median","mean")
d<-d[order(d[,"sample"], as.numeric(d[,"chr"]), as.numeric(d[,"start"])),]
d[,"chr"]<-paste0("chr",d[,"chr"])
d[,"type"]<-apply(d,1,function(x){
if(as.numeric(x["median"]) < 0){
return ("DELETION")
}else{
return ("DUPLICATION")
}
})
write.table(d, file="2110.call",sep="\t",col.names=T,row.names=F,quote=F)
[shengq1@cqs2 pbs]$ more 2110_JP_conifer.txt
python /home/shengq1/pylibs/bin/conifer.py rpkm --probes /scratch/cqs/lij17/cnv/SureSelect_XT_Human_All_Exon_V4_withoutchr_withoutY_lite.bed --input /scratch/cqs/shengq1/dnaseq/2110/bwa_markdup/2110-JP-1_realigned_recal_rmdup.sorted.bam --output rpkm/2110_JP_01.rpkm
python /home/shengq1/pylibs/bin/conifer.py rpkm --probes /scratch/cqs/lij17/cnv/SureSelect_XT_Human_All_Exon_V4_withoutchr_withoutY_lite.bed --input /scratch/cqs/shengq1/dnaseq/2110/bwa_markdup/2110-JP-2_realigned_recal_rmdup.sorted.bam --output rpkm/2110_JP_02.rpkm
python /home/shengq1/pylibs/bin/conifer.py rpkm --probes /scratch/cqs/lij17/cnv/SureSelect_XT_Human_All_Exon_V4_withoutchr_withoutY_lite.bed --input /scratch/cqs/shengq1/dnaseq/2110/bwa_markdup/2110-JP-3_realigned_recal_rmdup.sorted.bam --output rpkm/2110_JP_03.rpkm
python /home/shengq1/pylibs/bin/conifer.py rpkm --probes /scratch/cqs/lij17/cnv/SureSelect_XT_Human_All_Exon_V4_withoutchr_withoutY_lite.bed --input /scratch/cqs/shengq1/dnaseq/2110/bwa_markdup/2110-JP-4_realigned_recal_rmdup.sorted.bam --output rpkm/2110_JP_04.rpkm
python /home/shengq1/pylibs/bin/conifer.py rpkm --probes /scratch/cqs/lij17/cnv/SureSelect_XT_Human_All_Exon_V4_withoutchr_withoutY_lite.bed --input /scratch/cqs/shengq1/dnaseq/2110/bwa_markdup/2110-JP-5_realigned_recal_rmdup.sorted.bam --output rpkm/2110_JP_05.rpkm
python /home/shengq1/pylibs/bin/conifer.py rpkm --probes /scratch/cqs/lij17/cnv/SureSelect_XT_Human_All_Exon_V4_withoutchr_withoutY_lite.bed --input /scratch/cqs/shengq1/dnaseq/2110/bwa_markdup/2110-JP-6_realigned_recal_rmdup.sorted.bam --output rpkm/2110_JP_06.rpkm
python /home/shengq1/pylibs/bin/conifer.py rpkm --probes /scratch/cqs/lij17/cnv/SureSelect_XT_Human_All_Exon_V4_withoutchr_withoutY_lite.bed --input /scratch/cqs/shengq1/dnaseq/2110/bwa_markdup/2110-JP-7_realigned_recal_rmdup.sorted.bam --output rpkm/2110_JP_07.rpkm
python /home/shengq1/pylibs/bin/conifer.py rpkm --probes /scratch/cqs/lij17/cnv/SureSelect_XT_Human_All_Exon_V4_withoutchr_withoutY_lite.bed --input /scratch/cqs/shengq1/dnaseq/2110/bwa_markdup/2110-JP-8_realigned_recal_rmdup.sorted.bam --output rpkm/2110_JP_08.rpkm
python /home/shengq1/pylibs/bin/conifer.py rpkm --probes /scratch/cqs/lij17/cnv/SureSelect_XT_Human_All_Exon_V4_withoutchr_withoutY_lite.bed --input /scratch/cqs/shengq1/dnaseq/2110/bwa_markdup/2110-JP-9_realigned_recal_rmdup.sorted.bam --output rpkm/2110_JP_09.rpkm
python /home/shengq1/pylibs/bin/conifer.py rpkm --probes /scratch/cqs/lij17/cnv/SureSelect_XT_Human_All_Exon_V4_withoutchr_withoutY_lite.bed --input /scratch/cqs/shengq1/dnaseq/2110/bwa_markdup/2110-JP-10_realigned_recal_rmdup.sorted.bam --output rpkm/2110_JP_10.rpkm
python /home/shengq1/pylibs/bin/conifer.py rpkm --probes /scratch/cqs/lij17/cnv/SureSelect_XT_Human_All_Exon_V4_withoutchr_withoutY_lite.bed --input /scratch/cqs/shengq1/dnaseq/2110/bwa_markdup/2110-JP-11_realigned_recal_rmdup.sorted.bam --output rpkm/2110_JP_11.rpkm
python /home/shengq1/pylibs/bin/conifer.py rpkm --probes /scratch/cqs/lij17/cnv/SureSelect_XT_Human_All_Exon_V4_withoutchr_withoutY_lite.bed --input /scratch/cqs/shengq1/dnaseq/2110/bwa_markdup/2110-JP-12_realigned_recal_rmdup.sorted.bam --output rpkm/2110_JP_12.rpkm
python /home/shengq1/pylibs/bin/conifer.py rpkm --probes /scratch/cqs/lij17/cnv/SureSelect_XT_Human_All_Exon_V4_withoutchr_withoutY_lite.bed --input /scratch/cqs/shengq1/dnaseq/2110/bwa_markdup/2110-JP-13_realigned_recal_rmdup.sorted.bam --output rpkm/2110_JP_13.rpkm
python /home/shengq1/pylibs/bin/conifer.py rpkm --probes /scratch/cqs/lij17/cnv/SureSelect_XT_Human_All_Exon_V4_withoutchr_withoutY_lite.bed --input /scratch/cqs/shengq1/dnaseq/2110/bwa_markdup/2110-JP-14_realigned_recal_rmdup.sorted.bam --output rpkm/2110_JP_14.rpkm
python /home/shengq1/pylibs/bin/conifer.py rpkm --probes /scratch/cqs/lij17/cnv/SureSelect_XT_Human_All_Exon_V4_withoutchr_withoutY_lite.bed --input /scratch/cqs/shengq1/dnaseq/2110/bwa_markdup/2110-JP-15_realigned_recal_rmdup.sorted.bam --output rpkm/2110_JP_15.rpkm
python /home/shengq1/pylibs/bin/conifer.py rpkm --probes /scratch/cqs/lij17/cnv/SureSelect_XT_Human_All_Exon_V4_withoutchr_withoutY_lite.bed --input /scratch/cqs/shengq1/dnaseq/2110/bwa_markdup/2110-JP-16_realigned_recal_rmdup.sorted.bam --output rpkm/2110_JP_16.rpkm
python /home/shengq1/pylibs/bin/conifer.py analyze --probes /scratch/cqs/lij17/cnv/SureSelect_XT_Human_All_Exon_V4_withoutchr_withoutY_lite.bed --rpkm_dir rpkm/ --output 2110.hdf5 --svd 6 --write_svals 2110.svals --plot_scree 2110.png --write_sd 2110.sd
python /home/shengq1/pylibs/bin/conifer.py call --input 2110.hdf5 --output 2110.call
python /home/shengq1/pylibs/bin/conifer.py plotcalls --input 2110.hdf5 --calls 2110.call --output call_images
[shengq1@cqs2 result]$ more ExomeCopy_2110.r
library(exomeCopy)
setwd("/scratch/cqs/shengq1/dnaseq/2110/ExomeCopy/result")
my.fasta<-"/data/cqs/guoy1/reference/hg19/hg19_chr.fa"
my.bed<-"/scratch/cqs/lij17/cnv/SureSelect_XT_Human_All_Exon_V4_withoutchr_withoutY_lite.bed"
sample.names <- c(
"X2110_JP_01"
,"X2110_JP_02"
,"X2110_JP_03"
,"X2110_JP_04"
,"X2110_JP_05"
,"X2110_JP_06"
,"X2110_JP_07"
,"X2110_JP_08"
,"X2110_JP_09"
,"X2110_JP_10"
,"X2110_JP_11"
,"X2110_JP_12"
,"X2110_JP_13"
,"X2110_JP_14"
,"X2110_JP_15"
,"X2110_JP_16"
)
my.bams <- c(
"/scratch/cqs/shengq1/dnaseq/2110/bwa_markdup/2110-JP-1_realigned_recal_rmdup.sorted.bam"
,"/scratch/cqs/shengq1/dnaseq/2110/bwa_markdup/2110-JP-2_realigned_recal_rmdup.sorted.bam"
,"/scratch/cqs/shengq1/dnaseq/2110/bwa_markdup/2110-JP-3_realigned_recal_rmdup.sorted.bam"
,"/scratch/cqs/shengq1/dnaseq/2110/bwa_markdup/2110-JP-4_realigned_recal_rmdup.sorted.bam"
,"/scratch/cqs/shengq1/dnaseq/2110/bwa_markdup/2110-JP-5_realigned_recal_rmdup.sorted.bam"
,"/scratch/cqs/shengq1/dnaseq/2110/bwa_markdup/2110-JP-6_realigned_recal_rmdup.sorted.bam"
,"/scratch/cqs/shengq1/dnaseq/2110/bwa_markdup/2110-JP-7_realigned_recal_rmdup.sorted.bam"
,"/scratch/cqs/shengq1/dnaseq/2110/bwa_markdup/2110-JP-8_realigned_recal_rmdup.sorted.bam"
,"/scratch/cqs/shengq1/dnaseq/2110/bwa_markdup/2110-JP-9_realigned_recal_rmdup.sorted.bam"
,"/scratch/cqs/shengq1/dnaseq/2110/bwa_markdup/2110-JP-10_realigned_recal_rmdup.sorted.bam"
,"/scratch/cqs/shengq1/dnaseq/2110/bwa_markdup/2110-JP-11_realigned_recal_rmdup.sorted.bam"
,"/scratch/cqs/shengq1/dnaseq/2110/bwa_markdup/2110-JP-12_realigned_recal_rmdup.sorted.bam"
,"/scratch/cqs/shengq1/dnaseq/2110/bwa_markdup/2110-JP-13_realigned_recal_rmdup.sorted.bam"
,"/scratch/cqs/shengq1/dnaseq/2110/bwa_markdup/2110-JP-14_realigned_recal_rmdup.sorted.bam"
,"/scratch/cqs/shengq1/dnaseq/2110/bwa_markdup/2110-JP-15_realigned_recal_rmdup.sorted.bam"
,"/scratch/cqs/shengq1/dnaseq/2110/bwa_markdup/2110-JP-16_realigned_recal_rmdup.sorted.bam"
)
segments <- read.table(my.bed, sep="\t", as.is=TRUE, header=T)
target <- GRanges(segments[,1], IRanges(segments[,2]+1,segments[,3]), gene=segments[,4])
countfile<-"counts.RData"
if(file.exists(countfile)){
load(countfile)
}else{
counts <- RangedData(space = seqnames(target), ranges = ranges(target))
for (i in 1:length(my.bams)) {
counts[[sample.names[i]]] <- countBamInGRanges(my.bams[i], target)
}
counts[["GC"]] <- getGCcontent(target, my.fasta)
counts[["GC.sq"]] <- counts$GC^2
counts[["bg"]] <- generateBackground(sample.names, counts, median)
counts[["log.bg"]] <- log(counts[["bg"]] + 0.1)
counts[["width"]] <- width(counts)
save(counts, file=countfile)
}
fit.list <- lapply(sample.names, function(sample.name) {
lapply(seqlevels(target), function(seq.name) {
exomeCopy(counts[seq.name], sample.name, X.names = c("log.bg", "GC", "GC.sq", "width"), S = 0:4, d = 2)
})
})
compiled.segments <- compileCopyCountSegments(fit.list)
save(compiled.segments, file="compiled.segments.RData")
CNV.segments <- compiled.segments[compiled.segments$copy.count != 2, ]
CNV.segments <- CNV.segments[CNV.segments$nranges > 5, ]
CNV.df<-as.data.frame(CNV.segments)
write.table(x=CNV.df, file="ExomeCopy_2110.tsv", row.names=FALSE, sep="\t", quote=FALSE)
[shengq1@cqs2 result]$ more ExomeDepth_2110.r
library(ExomeDepth)
setwd("/scratch/cqs/shengq1/dnaseq/2110/ExomeDepth/result")
my.fasta<-"/data/cqs/guoy1/reference/hg19/hg19_chr.fa"
my.bed<-"/scratch/cqs/lij17/cnv/SureSelect_XT_Human_All_Exon_V4_withoutchr_withoutY_lite.bed"
sample.names <- c(
"X2110_JP_01"
,"X2110_JP_02"
,"X2110_JP_03"
,"X2110_JP_04"
,"X2110_JP_05"
,"X2110_JP_06"
,"X2110_JP_07"
,"X2110_JP_08"
,"X2110_JP_09"
,"X2110_JP_10"
,"X2110_JP_11"
,"X2110_JP_12"
,"X2110_JP_13"
,"X2110_JP_14"
,"X2110_JP_15"
,"X2110_JP_16"
)
my.bams <- c(
"/scratch/cqs/shengq1/dnaseq/2110/bwa_markdup/2110-JP-1_realigned_recal_rmdup.sorted.bam"
,"/scratch/cqs/shengq1/dnaseq/2110/bwa_markdup/2110-JP-2_realigned_recal_rmdup.sorted.bam"
,"/scratch/cqs/shengq1/dnaseq/2110/bwa_markdup/2110-JP-3_realigned_recal_rmdup.sorted.bam"
,"/scratch/cqs/shengq1/dnaseq/2110/bwa_markdup/2110-JP-4_realigned_recal_rmdup.sorted.bam"
,"/scratch/cqs/shengq1/dnaseq/2110/bwa_markdup/2110-JP-5_realigned_recal_rmdup.sorted.bam"
,"/scratch/cqs/shengq1/dnaseq/2110/bwa_markdup/2110-JP-6_realigned_recal_rmdup.sorted.bam"
,"/scratch/cqs/shengq1/dnaseq/2110/bwa_markdup/2110-JP-7_realigned_recal_rmdup.sorted.bam"
,"/scratch/cqs/shengq1/dnaseq/2110/bwa_markdup/2110-JP-8_realigned_recal_rmdup.sorted.bam"
,"/scratch/cqs/shengq1/dnaseq/2110/bwa_markdup/2110-JP-9_realigned_recal_rmdup.sorted.bam"
,"/scratch/cqs/shengq1/dnaseq/2110/bwa_markdup/2110-JP-10_realigned_recal_rmdup.sorted.bam"
,"/scratch/cqs/shengq1/dnaseq/2110/bwa_markdup/2110-JP-11_realigned_recal_rmdup.sorted.bam"
,"/scratch/cqs/shengq1/dnaseq/2110/bwa_markdup/2110-JP-12_realigned_recal_rmdup.sorted.bam"
,"/scratch/cqs/shengq1/dnaseq/2110/bwa_markdup/2110-JP-13_realigned_recal_rmdup.sorted.bam"
,"/scratch/cqs/shengq1/dnaseq/2110/bwa_markdup/2110-JP-14_realigned_recal_rmdup.sorted.bam"
,"/scratch/cqs/shengq1/dnaseq/2110/bwa_markdup/2110-JP-15_realigned_recal_rmdup.sorted.bam"
,"/scratch/cqs/shengq1/dnaseq/2110/bwa_markdup/2110-JP-16_realigned_recal_rmdup.sorted.bam"
)
segments <- read.table(my.bed, sep="\t", as.is=TRUE, header=T)
countfile<-"counts.RData"
if(file.exists(countfile)){
load(countfile)
}else{
counts <- getBamCounts(bed.frame = segments,
bam.files = my.bams,
include.chr = FALSE,
referenceFasta = my.fasta)
save(counts, file=countfile)
}
counts.dafr <- as(counts[, colnames(counts)], 'data.frame')
colnames(counts.dafr)[7:ncol(counts.dafr)]<-sample.names
counts.mat <- as.matrix(counts.dafr[, c(7:ncol(counts.dafr))])
nsamples <- ncol(counts.mat)
### start looping over each sample
for (i in 1:nsamples) {
#### Create the aggregate reference set for this sample
my.choice <- select.reference.set (test.counts = counts.mat[,i],
reference.counts = counts.mat[,-i],
bin.length = (counts.dafr$end - counts.dafr$start)/1000,
n.bins.reduced = 10000)
my.reference.selected <- apply(X = counts.mat[, my.choice$reference.choice, drop = FALSE],
MAR = 1,
FUN = sum)
message('Now creating the ExomeDepth object')
all.exons <- new('ExomeDepth',
test = counts.mat[,i],
reference = my.reference.selected,
formula = 'cbind(test, reference) ~ 1')
################ Now call the CNVs
all.exons <- CallCNVs(x = all.exons,
transition.probability = 10^-4,
chromosome = counts.dafr$space,
start = counts.dafr$start,
end = counts.dafr$end,
name = counts.dafr$names)
output.file <- paste0(colnames(counts.mat)[i], '.tsv')
write.table(file = output.file, x = all.exons@CNV.calls, row.names = FALSE, sep="\t", quote=FALSE)
}

## Sheet: TableS4
DELETION_overlap_0.5
	aCGH[1912]	CoNIFER[68]	cn.MOPS[271]	ExomeDepth[686]	exomeCopy[1475]
aCGH[1912]	-	48	201	611	801
CoNIFER[68]	57	-	13	60	62
cn.MOPS[271]	166	13	-	199	216
ExomeDepth[686]	370	35	137	-	381
exomeCopy[1475]	556	39	153	387	-
DELETION_overlap_1bp
	aCGH[1912]	CoNIFER[68]	cn.MOPS[271]	ExomeDepth[686]	exomeCopy[1475]
aCGH[1912]	-	51	213	638	820
CoNIFER[68]	57	-	14	60	63
cn.MOPS[271]	169	14	-	201	223
ExomeDepth[686]	380	35	137	-	393
exomeCopy[1475]	568	42	162	417	-
DUPLICATION_overlap_0.5
	aCGH[3313]	CoNIFER[199]	cn.MOPS[943]	ExomeDepth[895]	exomeCopy[1923]
aCGH[3313]	-	111	465	948	1029
CoNIFER[199]	129	-	71	126	158
cn.MOPS[943]	725	83	-	853	821
ExomeDepth[895]	609	59	218	-	448
exomeCopy[1923]	1220	95	280	659	-
DUPLICATION_overlap_1bp
	aCGH[3313]	CoNIFER[199]	cn.MOPS[943]	ExomeDepth[895]	exomeCopy[1923]
aCGH[3313]	-	114	480	993	1060
CoNIFER[199]	130	-	74	127	160
cn.MOPS[943]	725	87	-	859	830
ExomeDepth[895]	615	60	220	-	452
exomeCopy[1923]	1230	105	293	725	-
